# Supplementary material for: Correlates of Research Effort in Carnivores: Body Size, Range Size and Diet Matter
Source: PubMed Central journal article supplement (PMC3973602; doi:10.1371/journal.pone.0093195), 2014-04-02

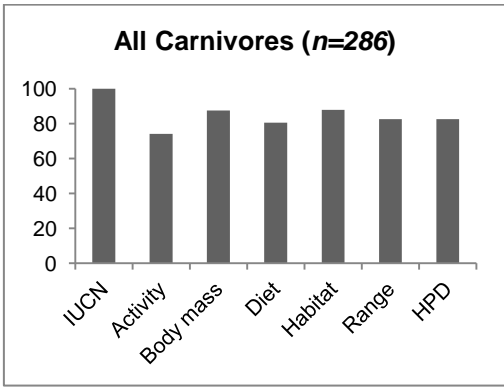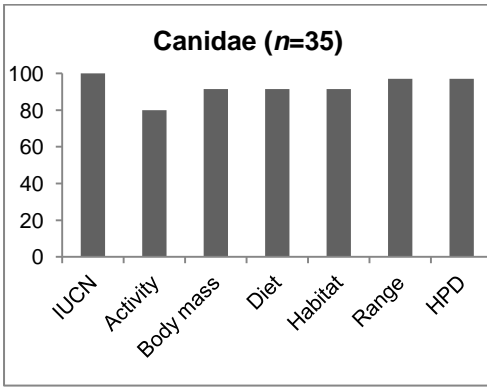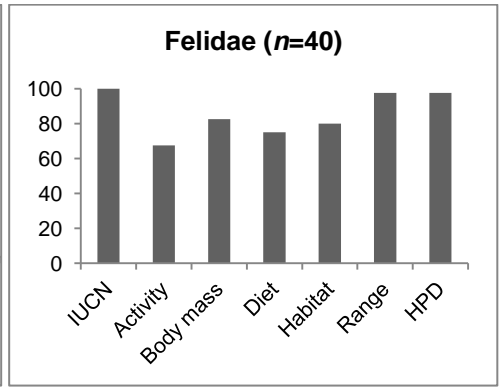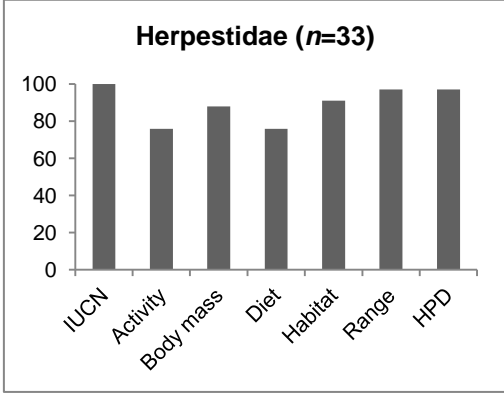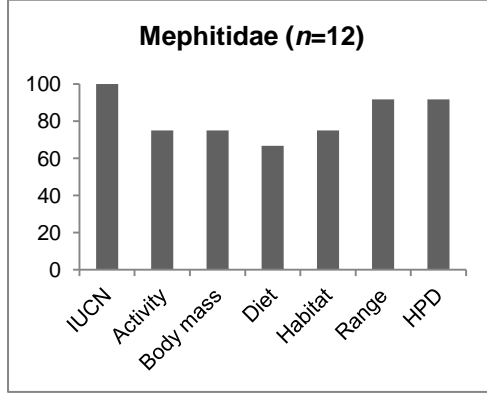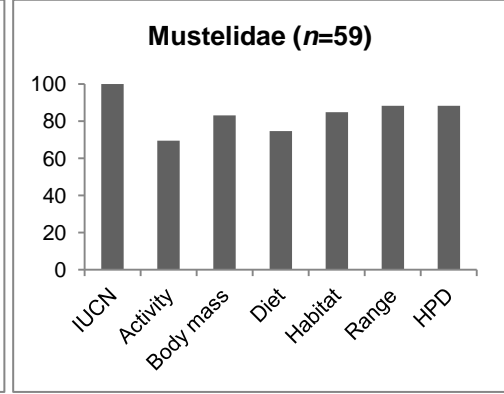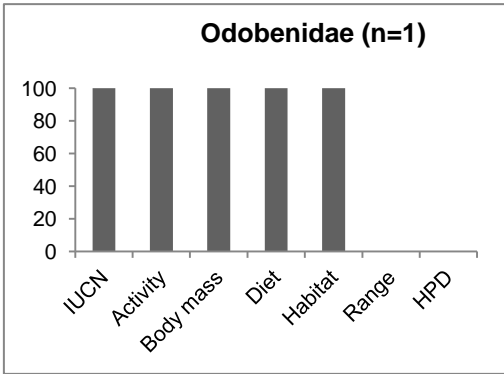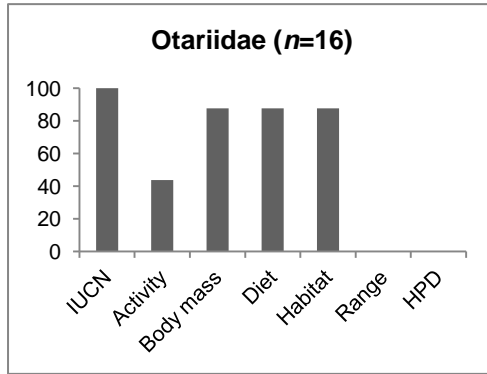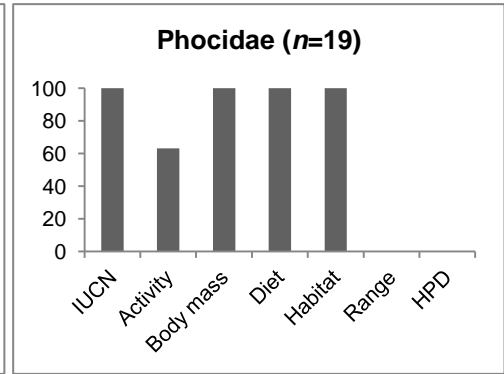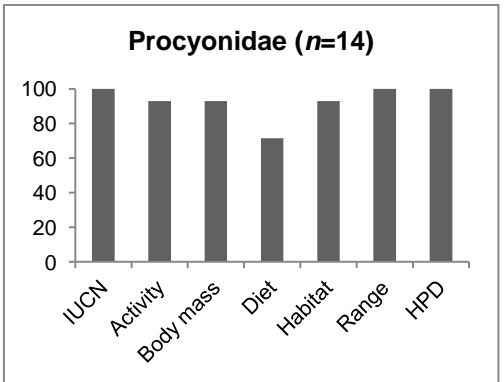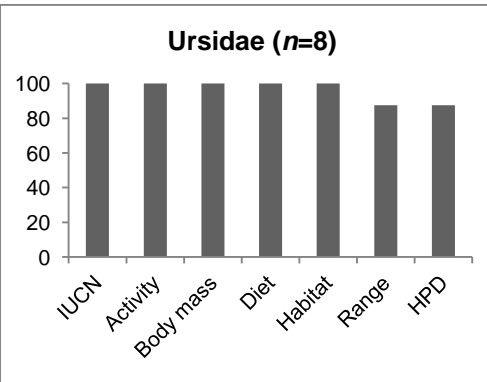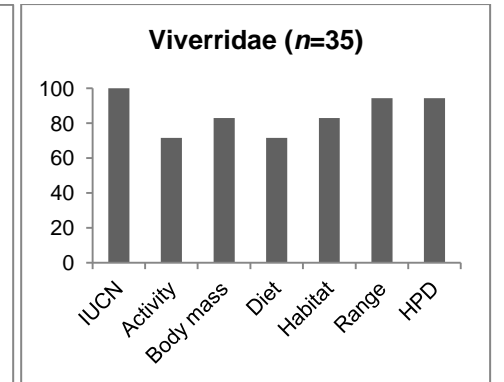

Supplement: pone.0093195.s001.pdf [file pone.0093195.s001.pdf]
